# Supplementary material for: Spatial habitats from multiparametric MR imaging are associated with signaling pathway activities and survival in glioblastoma
Source: PubMed Central journal article supplement (PMC5762568; doi:10.18632/oncotarget.22947), 2017-12-05
Supplement: oncotarget-08-112992-s001.pdf [file oncotarget-08-112992-s001.pdf]

## Spatial habitats from multiparametric MR imaging are associated with signaling pathway activities and survival in glioblastoma

### SUPPLEMENTARY MATERIALS

**Supplementary Table 1: Assessing relationship between Habitat proportions and patient OS using multivariate Cox proportional hazards regression analysis, adjusting for covariates age, KPS, tumor volume, and IDH1 mutation**

| Habitat number | <i>P</i> value | Enhancement combination based on the pixel intensity |    |     |    |
|----------------|----------------|------------------------------------------------------|----|-----|----|
|                |                | FLAIR                                                | T1 | T1C | T2 |
| 0              | 0.447          | 0                                                    | 0  | 0   | 0  |
| 1              | 0.016          | 0                                                    | 0  | 0   | 1  |
| 2              | 0.008          | 0                                                    | 0  | 1   | 0  |
| 3              | 0.385          | 0                                                    | 0  | 1   | 1  |
| 4              | 0.560          | 0                                                    | 1  | 0   | 0  |
| 5              | 0.961          | 0                                                    | 1  | 0   | 1  |
| 6              | 0.137          | 0                                                    | 1  | 1   | 0  |
| 7              | 0.033          | 0                                                    | 1  | 1   | 1  |
| 8              | 0.802          | 1                                                    | 0  | 0   | 0  |
| 9              | 0.521          | 1                                                    | 0  | 0   | 1  |
| 10             | 0.035          | 1                                                    | 0  | 1   | 0  |
| 11             | 0.996          | 1                                                    | 0  | 1   | 1  |
| 12             | 0.689          | 1                                                    | 1  | 0   | 0  |
| 13             | 0.318          | 1                                                    | 1  | 0   | 1  |
| 14             | 0.264          | 1                                                    | 1  | 1   | 0  |
| 15             | 0.965          | 1                                                    | 1  | 1   | 1  |

Habitats 1, 2, 7, 10 are significantly associated with OS. Note that only habitats 2, 7, 10 have positive variable importance as well (from random forest analysis). Hence, only those are considered for further interpretation.
